1 **Obesity Intervention in Sub-Saharan Africa: A systematic review protocol**

2

3

4

5 Kingsley Agyemang<sup>1</sup>, Nana Anokye<sup>1</sup>

6

7

8

9 1 Division of Global Public Health, Department of Health Sciences, College of Health, Medicine  
10 and Life Sciences, Brunel University London, Uxbridge, United Kingdom

11

12

13 Corresponding author: Nana Anokye

14 E-mail: [nana.anokye@brunel.ac.uk](mailto:nana.anokye@brunel.ac.uk)

15

16

17 **Abstract**

18 **Introduction:** The increasing prevalence of obesity in Sub-Saharan Africa (SSA) has made it a  
19 pressing public health issue that requires effective interventions tailored to the region's unique  
20 challenges. This protocol outlines a systematic review approach that aims to examine the existing  
21 evidence on obesity interventions in SSA, focusing on their effectiveness, implementation  
22 strategies, and potential barriers.

23 **Methods and analysis:** To identify relevant studies in Sub-Saharan Africa (SSA), MEDLINE  
24 (PubMed), MEDLINE (EBSCOHost), Scopus, Web of Science, PsycINFO, Cochrane and  
25 EMBASE databases will be searched during the review. Studies on obesity interventions in SSA  
26 will be considered for inclusion criteria, encompassing various intervention types, target  
27 populations, and study designs. Abstracts and titles will be independently assessed by two  
28 reviewers, who are aware of the author and journal information. A third reviewer will be consulted  
29 for cases where agreement was not reached or when clarity will be needed. The methodological  
30 quality of the included research will be assessed using the "Effective Public Health Practise Project  
31 quality assessment tool for quantitative studies. For data synthesis and reporting, two independent  
32 reviewers will assign effect scores to each intervention's outcome category (dietary behaviour,  
33 physical activity, or anthropometric outcomes) through a duplicate scoring exercise.

34 **Ethics and dissemination:** Since no original data will be collected as part of this review, ethical  
35 approval is not required. The completed review will be submitted for publication in a peer-  
36 reviewed journal and presented at conferences.

37 **PROSPERO registration number:** CRD42023430503

38 **Keywords:** Obesity intervention, Sub-Sahara Africa, Diet, Physical activity, behavioural change

## 39 **Introduction**

### 40 **Rationale**

41 Obesity is an ongoing pandemic[1]–[3] and following changes in dietary patterns and physical  
42 activity, the prevalence of obesity is anticipated to increase in both developed and developing  
43 nations[1], [4]–[7]. This poses a significant healthcare issue, due to its link to chronic diseases like  
44 diabetes, cardiovascular diseases, and certain types of cancer [8]. Over the years, Obesity has been  
45 described as "the silent killer" [9], further emphasizing its grave implications for public health.  
46 Obesity is defined by an elevated body mass index (BMI) and/or an excess accumulation of body  
47 fat[10]–[12]. Between 1975 and 2016, the worldwide occurrence of obesity experienced an almost  
48 threefold increase[3], [13], [14], with most of the world's population living in nations where being  
49 overweight or obese kills more people than being underweight [15].

50 The World Health Organization reported that in 2016, there was a prevalence of over 650 million  
51 obese adults, 340 million individuals aged 5 to 19 with obesity, and approximately 39 million  
52 children under the age of 5 affected by obesity [15]. However, the World Obesity Federation has  
53 issued a warning, predicting that if immediate action is not taken, the number of obese adults is  
54 projected to reach 1 billion by 2030[14], [16]. Additionally, economies of most low-middle-  
55 income countries including Sub-Sahara African countries are further affected as obesity has a  
56 heavy toll on productivity, increasing disease in sole wage workers[17]–[21].

57 It is estimated that Overweight and Obesity (OAO) cost 2.19% of the global Gross Domestic  
58 Product (GDP), with an average per capita value of US\$20 in Africa. This is expected to increase  
59 12-25 times in LMICs including Africa if immediate intervention is introduced to address this  
60 issue [17]. Literature has shown that the rates of overweight and obesity are increasing in sub-

61 Saharan Africa (SSA), particularly among urban populations[22]–[27]. This is further established  
62 in a multi-country cross-sectional study conducted in some sub-Saharan African countries  
63 recorded overweight prevalence of 31% and obesity prevalence of 34%[27]. It is important to note  
64 that the prevalence and risk factors of obesity differ across various regions globally[28], in sub-  
65 Saharan Africa, various factors such as socioeconomic status, age, parity, marital status, physical  
66 inactivity, body weight perceptions, and increased energy levels have been identified as significant  
67 predictors of overweight and obesity [29]. To effectively address this challenge in the SSA region,  
68 it is crucial to develop and adopt obesity interventions that are tailored to the specific  
69 characteristics of the population, recognizing the variations in demographics, socio-economic  
70 factors, and contextual factors [30]–[32].

71 Several interventions are currently used to manage weight in cases of obesity, which usually  
72 focused on implementing lifestyle changes that include physical activity and dietary  
73 recommendations[9], [33]–[35]. Nevertheless, there are mixed evidence on the effectiveness of  
74 these interventions[7], [36]–[40] which remains a major challenge in the fight against obesity  
75 especially in SSA. Additionally, there is paucity of studies on the obesity and the effectiveness of  
76 the available obesity interventions in SSA[38], [41]–[46]. Therefore, evidence from other  
77 countries and settings cannot be used to assume the best avenues for interventions in SSA [47]  
78 hence the need for robust evidence from systematic reviews assessing the effectiveness of the  
79 interventions in the context in which it was implemented, which may be culturally appropriate,  
80 cost-effective, and long-lasting public health preventive measure[15], [48]–[50].

81 Our scoping review reveals that no systematic review has been conducted in SSA to provide  
82 evidence on the effectiveness of obesity interventions introduced to reduce obesity in the region.  
83 However, the available systematic review on obesity intervention in SSA, focussed on childhood

84 obesity[32] but the rise in obesity rates is concerning globally, affecting all age groups and  
85 socioeconomic categories. The World Health Organization's (WHO) Global Action Plan  
86 encourages national governments to create public health strategies and NCD including obesity  
87 targets to enhance the health of the population [51], hence this systematic review will provide  
88 evidence on the effectiveness of several obesity interventions in SSA to inform policy direction.  
89 This systematic review will therefore be the first to address this gap in knowledge through the  
90 evaluation of the effectiveness of interventions targeting obesity in Africa by assessing existing  
91 evidence and considering diverse contexts. The review seeks to inform public health practice and  
92 guide the development of evidence-based interventions to combat obesity in Africa.

93

## 94 **Objectives**

95 The review will:

- 96 1. To conduct a thorough and systematic review of the existing literature on obesity  
97 interventions in Sub-Saharan Africa.
- 98 2. To evaluate the effectiveness of interventions aimed at addressing obesity in Sub-Saharan  
99 Africa, encompassing both lifestyle interventions and other approaches.
- 100 3. To find areas for further research and identify gaps in the current evidence base regarding  
101 obesity interventions in Sub-Saharan Africa.
- 102 4. To provide evidence-based recommendations for interventions that can effectively tackle  
103 the obesity epidemic in Sub-Saharan Africa while taking into account the region's unique  
104 cultural, socio-economic, and healthcare system factors.

## 105    **METHODS**

106    The reporting of this systematic review protocol follows the guidelines outlined in the Preferred  
107    Reporting Items for Systematic Reviews and Meta-Analyses Protocol (PRISMA-P) statement[52].  
108    The PRISMA checklist can be found in Supplementary file 1. Since this review focuses on  
109    published studies, obtaining ethics approval is not necessary. The review has been registered with  
110    the International Prospective Register of Systematic Reviews (PROSPERO) under the registration  
111    number CRD42023430503, with the registration date being 19<sup>th</sup> June 2023.

112

### 113    **Eligibility criteria**

#### 114    **Inclusion criteria**

115    **Study setting:** Sub-Saharan African nation in accordance with the regional criteria by the world  
116    bank[53]

117    **Population:** 1. Studies were included if interventions targeted participants who were obese or  
118    overweight, regardless of age, including both children and adults. 2. Interventions carried out in  
119    community-based settings, which may include but are not limited to schools, workplaces, and  
120    recreational centres.

121    **Intervention:** Any intervention to reduce or prevent obesity/overweight in any Sub-Sahara  
122    African country, including but not limited to dietary, physical activity, lifestyle weight  
123    management and behavioural change techniques.

124 **Comparator:** 1. Studies that may have compared different interventions targeting obesity in  
125 community-based settings. 2. In certain cases, studies exploring the effectiveness of specific  
126 interventions may have included placebo or sham interventions as controls.

127 **Outcomes:** 1. Body composition, as well as outcomes associated to adiposity, such as the  
128 prevalence of overweight and obesity. 2. Intermediate behavioural outcomes, including  
129 modifications in sedentary behaviour, eating behaviour, and physical activity and fitness levels. 3.  
130 In terms of behavioural outcomes, both objective and subjective assessments of physical activity,  
131 dietary behaviour, and other relevant behaviours such as sedentary behaviour are considered  
132 appropriate.

133 **Study design:** Experimental studies, which consisted of randomized controlled trials (RCTs),  
134 quasi-experimental studies, controlled clinical trials, and cluster trials. prospective cohort studies  
135 with a control group, interrupted time series and repeated measure studies, and natural  
136 experiments.

137

### 138 **Exclusion criteria**

139 1. Interventions specifically targeted participants who were not overweight or obese, regardless of  
140 age, including both children and adults.

141 2. Studies aimed at expanding interventions in medical settings like hospitals or general practice.

142 3. Any intervention that involved using medication, surgery, or dietary supplements to help people  
143 lose weight.

- 144 4. Interventions that focused on populations with pre-existing medical conditions or obesity-  
145 related co-morbidities.
- 146 5. Non-experimental studies, cross-sectional studies, non-human studies, laboratory-based studies.
- 147 6. Health outcomes that do not report on relevant adiposity outcomes.
- 148 7. Behavioural treatments that do not include important behavioural outcomes such as increased  
149 in physical activities, dietary behaviour, fitness, or sedentary behaviour.
- 150 8. Working papers, reports, dissertations, books, websites, conference abstracts, and research  
151 protocols.
- 152 9. Studies that were conducted in countries outside the sub-Saharan region.

153

#### 154 **Search strategy**

155 A scoping review of systematic review methodologies in the discipline was used to choose  
156 databases for this study[32], [38], [54]–[57]. To identify potentially eligible studies, an extensive  
157 search will be conducted across multiple databases including MEDLINE (PubMed), MEDLINE  
158 (EBSCOHost), Scopus, Web of Science, PsycINFO, Cochrane and EMBASE. Subject header and  
159 free text searches will be performed, employing Boolean search methods like "AND" and "OR"  
160 aligning with the eligibility criteria for the systematic review. Unique search terms will be  
161 employed for each database, tailoring the search strategy accordingly. The comprehensive search  
162 strategy of PubMed, including the specific details, can be found in the Supplementary material (2).  
163 Our search will not be limited by language or publication year.

164



165 **Study selection**

166 Abstracts and titles will be independently assessed by two reviewers, who were aware of the author  
167 and journal information. Google Translate will be utilized to determine the eligibility of abstracts  
168 not published in English. Full papers of potentially eligible studies will be obtained for a more  
169 thorough evaluation. For manuscripts not published in English, translation of the entire text will  
170 be done. The two reviewers reached a consensus on study inclusion, and a third reviewer will be  
171 consulted for cases where agreement was not reached or when clarity was needed. Manuscripts  
172 with incomplete texts will be excluded based on the primary reason stated.

173

174 **Data management and extraction**

175 A pretested spreadsheet will be used by one reviewer to extract the data, while a second reviewer  
176 cross-checked the generated data and added any missing information. The data that will be  
177 extracted included a variety of information, such as the study title, intervention details, target  
178 population, study design, information on comparisons or control groups, outcomes, measurement  
179 methods, publication type, publication year, study setting, country, language, inclusion criteria,  
180 baseline descriptive data, randomization procedure, intervention duration, follow-up period,  
181 number of follow-ups, participant attrition, sample size, and effectiveness for relevant outcome  
182 statistical tests and adjustments, subgroup effects (if applicable), and any additional publications  
183 referenced in the article[32].

184

185

## 186 **Risk of bias and quality assessment**

187 The methodological quality of the included research will be assessed using the "Effective Public  
188 Health Practise Project quality assessment tool for quantitative studies"[58]. This tool evaluated  
189 six criteria, including selection bias, research design, confounders, blinding, data collection  
190 techniques, and withdrawals/drop-outs. Each criterion will be rated as weak, moderate, or strong  
191 for each study. The overall score for each study will be calculated by summing the ratings across  
192 the six components. Studies that received no weak ratings were categorized as strong, those with  
193 one weak rating will be categorized as moderate, and those with two or more weak ratings will be  
194 categorized as weak[55].

195

## 196 **Data synthesis and reporting**

197 Two independent reviewers will assign effect scores to each intervention's outcome category  
198 (dietary behaviour, physical activity, or anthropometric outcomes) through a duplicate scoring  
199 exercise. This scoring method, employed in a previous review[32], [59], [60], involved assigning  
200 scores ranging from "++" to "--" based on the composite of relevant outcomes reported in each  
201 study. A score of "++" will indicate a statistically significant and clearly intervention-attributable  
202 desired change on the primary outcome or most outcomes of interest. A score of "+" will indicate  
203 a desired change on the primary outcome or mostly desired changes on relevant outcomes. A score  
204 of "0" will indicate no changes, mostly no changes, or both positive and negative changes. A score  
205 of "-" will signify a statistically significant, obviously intervention-attributable negative change on  
206 the primary outcome or most outcomes of interest, while "--" denotes a statistically significant,  
207 definitely intervention-attributable negative change on the primary outcome or most outcomes of

208 interest. The two authors will review scoring discrepancies, ensuring that each intervention aligns  
209 with the established scoring criteria. Additionally, they will create summary scores for each  
210 behaviour by comparing the number of varied scores and assigning the most frequent score as the  
211 summary score.

212

### 213 **Study status**

214 In April 2023, a scoping study of the obesity interventions in Africa was conducted to inform the  
215 techniques of the present review. The scoping review involved identifying existing systematic  
216 reviews on obesity interventions and identifying knowledge gaps. However, the results of the  
217 scoping review have not been submitted for publication. In May 2023, the review design in SSA  
218 was proposed, and methods were established. In June 2023, the search strategy was tried, and the  
219 protocol was also created. In July 2023, the protocol was submitted for peer review for the first  
220 time. Data collection will begin after the protocol for publication is approved and will be finished  
221 in three months.

222

### 223 **Patient and public involvement**

224 The involvement of patients and the public is not included in this study since original data  
225 collection will not take place. The study will adhere to established best practice guidelines for  
226 conducting systematic reviews[61], [62].

227

228

## 229 **DISCUSSION**

230 The systematic review protocol aims to improve our understanding of obesity interventions in Sub-  
231 Saharan Africa. By reviewing the literature systematically, assessing the effectiveness of  
232 interventions, identifying gaps in knowledge, and providing evidence-based recommendations,  
233 this study will contribute to the existing knowledge and offer valuable insights for addressing the  
234 obesity epidemic in this region. The results of this review will be shared widely to ensure their  
235 reach and impact. The insights obtained from this study will be disseminated through conference  
236 presentations and published in peer-reviewed journals, making them accessible to the broader  
237 research community and stakeholders.

238

### 239 **Strength and limitations of the study**

- 240 • This is the first systematic review on obesity interventions in SSA that aims to provide  
241 quality evidence for the effectiveness of obesity interventions in Sub-Sahara Africa and  
242 identify salient features of effective interventions.
- 243 • The study aims to suggest evidence-based interventions that suit the region by considering  
244 the specific factors of culture, economy, and health system in Sub-Saharan Africa.
- 245 • The study aims to identify gaps in the current evidence base, highlighting areas that require  
246 further research and investigation.
- 247 • We did not exclude any articles based on language, but we searched only in English. This  
248 might have limited our search results if some articles in other languages did not have  
249 abstracts or keywords in English.
- 250 • Publication bias might affect this review because it only includes studies that have been  
251 peer reviewed.

252

253 **Acknowledgements**

254 We express our gratitude to the Brunel Global Health Academy for their valuable support and  
255 assistance.

256

257 **Author Contributions:** The concept for the review was developed by NA and KA. KA took the  
258 lead in writing the initial draft, while both KA and NA collaborated in revising the protocol. NA  
259 will assume the role of being the guarantor of the review, ensuring its overall integrity and  
260 accuracy.

261

262 **Funding:** None

263

264 **Competing interests:** None declared

265

266 **Patient consent for publication:** Not required.

267

268

269

270 REFERENCES

- 271 [1] K. M. Flegal, "Excess Deaths Associated With Underweight, Overweight, and Obesity," *JAMA*, vol.  
272 293, no. 15, p. 1861, Apr. 2005, doi: 10.1001/jama.293.15.1861.
- 273 [2] A. M. Jastreboff, C. M. Kotz, S. Kahan, A. S. Kelly, and S. B. Heymsfield, "Obesity as a Disease: The  
274 Obesity Society 2018 Position Statement," *Obesity*, vol. 27, no. 1, pp. 7–9, Jan. 2019, doi:  
275 10.1002/oby.22378.
- 276 [3] The Lancet Gastroenterology & Hepatology, "Obesity: another ongoing pandemic," *Lancet*  
277 *Gastroenterol Hepatol*, vol. 6, no. 6, p. 411, Jun. 2021, doi: 10.1016/S2468-1253(21)00143-6.
- 278 [4] T. Bhurosy and R. Jeewon, "Overweight and Obesity Epidemic in Developing Countries: A  
279 Problem with Diet, Physical Activity, or Socioeconomic Status?," *The Scientific World Journal*, vol.  
280 2014, pp. 1–7, 2014, doi: 10.1155/2014/964236.
- 281 [5] M. Ellulu, Y. Abed, A. Rahmat, Y. Ranneh, and F. Ali, "Epidemiology of obesity in developing  
282 countries: challenges and prevention," *Global Epidemic Obesity*, vol. 2, no. 1, p. 2, 2014, doi:  
283 10.7243/2052-5966-2-2.
- 284 [6] R. I. Kostis and D. B. Panagiotakos, "THE EPIDEMIC OF OBESITY IN CHILDREN AND ADOLESCENTS IN  
285 THE WORLD," 2006.
- 286 [7] A.-L. Kinmonth *et al.*, "Efficacy of a theory-based behavioural intervention to increase physical  
287 activity in an at-risk group in primary care (ProActive UK): a randomised trial," *The Lancet*, vol.  
288 371, no. 9606, pp. 41–48, Jan. 2008, doi: 10.1016/S0140-6736(08)60070-7.
- 289 [8] S. K. K Y, P. K. R Bhat, and C. J. Sorake, "Double trouble: a pandemic of obesity and COVID-19,"  
290 *Lancet Gastroenterol Hepatol*, vol. 6, no. 8, p. 608, Aug. 2021, doi: 10.1016/S2468-  
291 1253(21)00190-4.
- 292 [9] G. Muscogiuri, M. El Ghoch, A. Colao, M. Hassapidou, V. Yumuk, and L. Busetto, "European  
293 Guidelines for Obesity Management in Adults with a Very Low-Calorie Ketogenic Diet: A  
294 Systematic Review and Meta-Analysis," *Obes Facts*, vol. 14, no. 2, pp. 222–245, 2021, doi:  
295 10.1159/000515381.
- 296 [10] A. Gohar, M. Shakeel, Richard. L. Atkinson, and D. J. Haleem, "Potential mechanisms of  
297 improvement in body weight, metabolic profile, and liver metabolism by honey in rats on a high  
298 fat diet," *PharmaNutrition*, vol. 14, p. 100227, Dec. 2020, doi: 10.1016/j.phanu.2020.100227.
- 299 [11] P. Deurenberg and M. Yap, "The assessment of obesity: methods for measuring body fat and  
300 global prevalence of obesity," *Best Pract Res Clin Endocrinol Metab*, vol. 13, no. 1, pp. 1–11, Apr.  
301 1999, doi: 10.1053/beem.1999.0003.
- 302 [12] F. Q. Nuttall, "Body Mass Index," *Nutr Today*, vol. 50, no. 3, pp. 117–128, May 2015, doi:  
303 10.1097/NT.0000000000000092.
- 304 [13] World Health Organization(WHO), "Obesity and overweight. ," *World Health Organization*, 2020.  
305 <https://www.who.int/news-room/fact-sheets/detail/obesity-and-overweight> (accessed Mar. 16,  
306 2023).

- 307 [14] World Obesity, "Prevalence of Obesity." [https://www.worldobesity.org/about/about-](https://www.worldobesity.org/about/about-obesity/prevalence-of-obesity)  
308 obesity/prevalence-of-obesity (accessed Jul. 07, 2023).
- 309 [15] World Health Organization, "Obesity and overweight," Jun. 09, 2021. [https://www.who.int/news-](https://www.who.int/news-room/fact-sheets/detail/obesity-and-overweight)  
310 room/fact-sheets/detail/obesity-and-overweight (accessed Jul. 03, 2023).
- 311 [16] T. Lobstein, H. Brinsden, and M. Neveux, *World Obesity Atlas 2022*. 2022. Accessed: Jul. 09, 2023.  
312 [Online]. Available:  
313 [https://policycommons.net/artifacts/2266990/world\\_obesity\\_atlas\\_2022\\_web/3026660/?utm\\_](https://policycommons.net/artifacts/2266990/world_obesity_atlas_2022_web/3026660/?utm_medium=email&utm_source=transaction)  
314 [medium=email&utm\\_source=transaction](https://policycommons.net/artifacts/2266990/world_obesity_atlas_2022_web/3026660/?utm_medium=email&utm_source=transaction)
- 315 [17] A. Okunogbe, R. Nugent, G. Spencer, J. Powis, J. Ralston, and J. Wilding, "Economic impacts of  
316 overweight and obesity: current and future estimates for 161 countries," *BMJ Glob Health*, vol. 7,  
317 no. 9, p. e009773, Sep. 2022, doi: 10.1136/bmjgh-2022-009773.
- 318 [18] A. Okunogbe, R. Nugent, G. Spencer, J. Ralston, and J. Wilding, "Economic impacts of overweight  
319 and obesity: current and future estimates for eight countries," *BMJ Glob Health*, vol. 6, no. 10, p.  
320 e006351, Oct. 2021, doi: 10.1136/bmjgh-2021-006351.
- 321 [19] A. Vaidya, S. Shakya, and A. Krettek, "Obesity Prevalence in Nepal: Public Health Challenges in a  
322 Low-Income Nation during an Alarming Worldwide Trend," *Int J Environ Res Public Health*, vol. 7,  
323 no. 6, pp. 2726–2744, Jun. 2010, doi: 10.3390/ijerph7062726.
- 324 [20] A. Drewnowski, "Impact of nutrition interventions and dietary nutrient density on productivity in  
325 the workplace," *Nutr Rev*, vol. 78, no. 3, pp. 215–224, Mar. 2020, doi: 10.1093/nutrit/nuz088.
- 326 [21] Harvard School of Public Health, "Obesity Trends: Tracking the Global Epidemic."  
327 <https://www.hsph.harvard.edu/obesity-prevention-source/obesity-trends/> (accessed Jul. 03,  
328 2023).
- 329 [22] E. W. Kimani-Murage, K. Kahn, J. M. Pettifor, S. M. Tollman, K. Klipstein-Grobusch, and S. A.  
330 Norris, "Predictors of adolescent weight status and central obesity in rural South Africa," *Public*  
331 *Health Nutr*, vol. 14, no. 6, pp. 1114–1122, Jun. 2011, doi: 10.1017/S1368980011000139.
- 332 [23] A. R. Abubakari, W. Lauder, C. Agyemang, M. Jones, A. Kirk, and R. S. Bhopal, "Prevalence and  
333 time trends in obesity among adult West African populations: a meta-analysis," *Obesity Reviews*,  
334 vol. 9, no. 4, pp. 297–311, Jul. 2008, doi: 10.1111/j.1467-789X.2007.00462.x.
- 335 [24] H. S. Kruger, T. Puoane, M. Senekal, and M.-T. van der Merwe, "Obesity in South Africa:  
336 challenges for government and health professionals," *Public Health Nutr*, vol. 8, no. 5, pp. 491–  
337 500, Aug. 2005, doi: 10.1079/PHN2005785.
- 338 [25] A. M. N. Renzaho, "Fat, rich and beautiful: changing socio-cultural paradigms associated with  
339 obesity risk, nutritional status and refugee children from sub-Saharan Africa," *Health Place*, vol.  
340 10, no. 1, pp. 105–113, Mar. 2004, doi: 10.1016/S1353-8292(03)00051-0.
- 341 [26] W. A. O. Afolabi, A. A. Addo, and M. A. Sonibare, "Activity pattern, energy intake and obesity  
342 among Nigerian urban market women," *Int J Food Sci Nutr*, vol. 55, no. 2, pp. 85–90, Mar. 2004,  
343 doi: 10.1080/09637480410001666450.

- 344 [27] I. O. Ajayi *et al.*, “Urban–rural and geographic differences in overweight and obesity in four sub-  
345 Saharan African adult populations: a multi-country cross-sectional study,” *BMC Public Health*, vol.  
346 16, no. 1, p. 1126, Dec. 2016, doi: 10.1186/s12889-016-3789-z.
- 347 [28] G. K. Singh, M. D. Kogan, and P. C. van Dyck, “A Multilevel Analysis of State and Regional  
348 Disparities in Childhood and Adolescent Obesity in the United States,” *J Community Health*, vol.  
349 33, no. 2, pp. 90–102, Apr. 2008, doi: 10.1007/s10900-007-9071-7.
- 350 [29] C. Agyemang, S. Boatemaa, G. A. Frempong, and A. de-Graft Aikins, “Obesity in Sub-Saharan  
351 Africa,” in *Metabolic Syndrome*, Cham: Springer International Publishing, 2015, pp. 1–13. doi:  
352 10.1007/978-3-319-12125-3\_5-1.
- 353 [30] H. J. Lim, H. Xue, and Y. Wang, “Global Trends in Obesity,” in *Handbook of Eating and Drinking*,  
354 Cham: Springer International Publishing, 2020, pp. 1217–1235. doi: 10.1007/978-3-030-14504-  
355 0\_157.
- 356 [31] S. Neupane, P. K.C., and D. T. Doku, “Overweight and obesity among women: analysis of  
357 demographic and health survey data from 32 Sub-Saharan African Countries,” *BMC Public Health*,  
358 vol. 16, no. 1, p. 30, Dec. 2015, doi: 10.1186/s12889-016-2698-5.
- 359 [32] S. Klingberg, C. E. Draper, L. K. Micklesfield, S. E. Benjamin-Neelon, and E. M. F. van Sluijs,  
360 “Childhood obesity prevention in africa: A systematic review of intervention effectiveness and  
361 implementation,” *International Journal of Environmental Research and Public Health*, vol. 16, no.  
362 7. MDPI AG, Apr. 01, 2019. doi: 10.3390/ijerph16071212.
- 363 [33] C. D. Madigan *et al.*, “Effectiveness of weight management interventions for adults delivered in  
364 primary care: systematic review and meta-analysis of randomised controlled trials,” *BMJ*, p.  
365 e069719, May 2022, doi: 10.1136/bmj-2021-069719.
- 366 [34] P. J. Teixeira *et al.*, “Successful behavior change in obesity interventions in adults: a systematic  
367 review of self-regulation mediators,” *BMC Med*, vol. 13, no. 1, p. 84, Dec. 2015, doi:  
368 10.1186/s12916-015-0323-6.
- 369 [35] G. B. Samdal, G. E. Eide, T. Barth, G. Williams, and E. Meland, “Effective behaviour change  
370 techniques for physical activity and healthy eating in overweight and obese adults; systematic  
371 review and meta-regression analyses,” *International Journal of Behavioral Nutrition and Physical  
372 Activity*, vol. 14, no. 1, p. 42, Dec. 2017, doi: 10.1186/s12966-017-0494-y.
- 373 [36] M. K. Eriksson, P. W. Franks, and M. Eliasson, “A 3-Year Randomized Trial of Lifestyle Intervention  
374 for Cardiovascular Risk Reduction in the Primary Care Setting: The Swedish Björknäs Study,” *PLoS  
375 One*, vol. 4, no. 4, p. e5195, Apr. 2009, doi: 10.1371/journal.pone.0005195.
- 376 [37] E. M. F. van Sluijs, M. N. M. van Poppel, and W. van Mechelen, “Stage-based lifestyle  
377 interventions in primary care,” *Am J Prev Med*, vol. 26, no. 4, pp. 330–343, May 2004, doi:  
378 10.1016/j.amepre.2003.12.010.
- 379 [38] H. Zaghoul, H. Elshakh, A. Elzafarany, O. Chagoury, B. McGowan, and S. Taheri, “A systematic  
380 review of randomized controlled trials of dietary interventions for weight loss in adults in the



- 381 Middle East and north Africa region," *Clinical Obesity*, vol. 11, no. 2. John Wiley and Sons Inc, Apr.  
382 01, 2021. doi: 10.1111/cob.12434.
- 383 [39] D. J. Johns, J. Hartmann-Boyce, S. A. Jebb, and P. Aveyard, "Diet or Exercise Interventions vs  
384 Combined Behavioral Weight Management Programs: A Systematic Review and Meta-Analysis of  
385 Direct Comparisons," *J Acad Nutr Diet*, vol. 114, no. 10, pp. 1557–1568, Oct. 2014, doi:  
386 10.1016/j.jand.2014.07.005.
- 387 [40] M. A. van Baak, G. Hul, A. Astrup, and W. H. Saris, "Physical Activity, Weight Loss, and Weight  
388 Maintenance in the DiOGenes Multicenter Trial," *Front Nutr*, vol. 8, Jun. 2021, doi:  
389 10.3389/fnut.2021.683369.
- 390 [41] S. Menon and J. L. Peñalvo, "Actions Targeting the Double Burden of Malnutrition: A Scoping  
391 Review," *Nutrients*, vol. 12, no. 1, p. 81, Dec. 2019, doi: 10.3390/nu12010081.
- 392 [42] F. I. Danquah, M. Ansu-Mensah, V. Bawontuo, M. Yeboah, and D. Kuupiel, "Prevalence,  
393 incidence, and trends of childhood overweight/obesity in Sub-Saharan Africa: a systematic  
394 scoping review," *Archives of Public Health*, vol. 78, no. 1, p. 109, Dec. 2020, doi: 10.1186/s13690-  
395 020-00491-2.
- 396 [43] K. Juma *et al.*, "From HIV prevention to non-communicable disease health promotion efforts in  
397 sub-Saharan Africa," *AIDS*, vol. 32, no. Supplement 1, pp. S63–S73, Jul. 2018, doi:  
398 10.1097/QAD.0000000000001879.
- 399 [44] A. A. Wamba, N. F. Takah, and C. Johnman, "The impact of interventions for the primary  
400 prevention of hypertension in Sub-Saharan Africa: A systematic review and meta-analysis," *PLoS*  
401 *One*, vol. 14, no. 7, p. e0219623, Jul. 2019, doi: 10.1371/journal.pone.0219623.
- 402 [45] A. Scott, C. S. Ejikeme, E. N. Clottey, and J. G. Thomas, "Obesity in sub-Saharan Africa:  
403 development of an ecological theoretical framework," *Health Promot Int*, vol. 28, no. 1, pp. 4–16,  
404 Mar. 2013, doi: 10.1093/heapro/das038.
- 405 [46] J. Iwelunmor *et al.*, "Toward the sustainability of health interventions implemented in sub-  
406 Saharan Africa: a systematic review and conceptual framework," *Implementation Science*, vol. 11,  
407 no. 1, p. 43, Dec. 2015, doi: 10.1186/s13012-016-0392-8.
- 408 [47] T. T.-T. Edejer, *Making choices in health: WHO guide to cost-effectiveness analysis.*, vol. 1. 2003.
- 409 [48] J. Rycroft-Malone *et al.*, "Realist synthesis: illustrating the method for implementation research,"  
410 *Implementation Science*, vol. 7, no. 1, p. 33, Dec. 2012, doi: 10.1186/1748-5908-7-33.
- 411 [49] B. K. Defo, "Demographic, epidemiological, and health transitions: are they relevant to  
412 population health patterns in Africa?," *Glob Health Action*, vol. 7, no. 1, p. 22443, Dec. 2014, doi:  
413 10.3402/gha.v7.22443.
- 414 [50] R. Ofori-Asenso, A. A. Agyeman, A. Laar, and D. Boateng, "Overweight and obesity epidemic in  
415 Ghana—a systematic review and meta-analysis," *BMC Public Health*, vol. 16, no. 1, p. 1239, Dec.  
416 2016, doi: 10.1186/s12889-016-3901-4.

- 417 [51] World Health Organization, *Global action plan for the prevention and control of*  
418 *noncommunicable diseases, 2013-2020*. Geneva: WHO, 2013.
- 419 [52] L. Shamseer *et al.*, “Preferred reporting items for systematic review and meta-analysis protocols  
420 (PRISMA-P) 2015: elaboration and explanation,” *BMJ*, vol. 349, no. jan02 1, pp. g7647–g7647,  
421 Jan. 2015, doi: 10.1136/bmj.g7647.
- 422 [53] The World Bank, “Sub-Saharan Africa,” *Sub-Saharan Africa*, 2016.  
423 <https://data.worldbank.org/region/sub-saharan-africa> (accessed May 17, 2023).
- 424 [54] R. Myers-Ingram, J. Sampford, R. Milton-Cole, and G. D. Jones, “Effectiveness of eHealth weight  
425 management interventions in overweight and obese adults from low socioeconomic groups: a  
426 systematic review,” *Syst Rev*, vol. 12, no. 1, p. 59, Dec. 2023, doi: 10.1186/s13643-023-02207-3.
- 427 [55] T. Adom, A. De Villiers, T. Puoane, and A. P. Kengne, “School-based interventions targeting  
428 nutrition and physical activity, and body weight status of African children: A systematic review,”  
429 *Nutrients*, vol. 12, no. 1. MDPI AG, Jan. 01, 2020. doi: 10.3390/nu12010095.
- 430 [56] A. Maula *et al.*, “Educational weight loss interventions in obese and overweight adults with type  
431 2 diabetes: a systematic review and meta-analysis of randomized controlled trials,” *Diabetic*  
432 *Medicine*, vol. 37, no. 4. Blackwell Publishing Ltd, pp. 623–635, Apr. 01, 2020. doi:  
433 10.1111/dme.14193.
- 434 [57] A. Z. Khambalia, S. Dickinson, L. L. Hardy, T. Gill, and L. A. Baur, “A synthesis of existing systematic  
435 reviews and meta-analyses of school-based behavioural interventions for controlling and  
436 preventing obesity,” *Obesity Reviews*, vol. 13, no. 3, pp. 214–233, Mar. 2012, doi:  
437 10.1111/j.1467-789X.2011.00947.x.
- 438 [58] S. Armijo-Olivo, C. R. Stiles, N. A. Hagen, P. D. Biondo, and G. G. Cummings, “Assessment of study  
439 quality for systematic reviews: A comparison of the Cochrane Collaboration Risk of Bias Tool and  
440 the Effective Public Health Practice Project Quality Assessment Tool: Methodological research,” *J*  
441 *Eval Clin Pract*, vol. 18, no. 1, pp. 12–18, Feb. 2012, doi: 10.1111/j.1365-2753.2010.01516.x.
- 442 [59] J. F. Sallis, J. J. Prochaska, and W. C. Taylor, “A review of correlates of physical activity of children  
443 and adolescents,” *Med Sci Sports Exerc*, vol. 32, no. 5, pp. 963–975, 2000, doi:  
444 10.1097/00005768-200005000-00014.
- 445 [60] S. G. TROST, N. OWEN, A. E. BAUMAN, J. F. SALLIS, and W. BROWN, “Correlates of adults???  
446 participation in physical activity: review and update,” *Med Sci Sports Exerc*, vol. 34, no. 12, pp.  
447 1996–2001, Dec. 2002, doi: 10.1097/00005768-200212000-00020.
- 448 [61] E. Ahn and H. Kang, “Introduction to systematic review and meta-analysis,” *Korean J Anesthesiol*,  
449 vol. 71, no. 2, pp. 103–112, Apr. 2018, doi: 10.4097/kjae.2018.71.2.103.
- 450 [62] F. MacMillan, K. A. McBride, E. S. George, and G. Z. Steiner, “Conducting a Systematic Review: A  
451 Practical Guide,” in *Handbook of Research Methods in Health Social Sciences*, Singapore: Springer  
452 Singapore, 2019, pp. 805–826. doi: 10.1007/978-981-10-5251-4\_113.
